# Supplementary material for: Domestic sewage dispersion scenarios as a subsidy to the design of urban sewage systems in the Lower Amazon River, Amapá, Brazil
Source: PeerJ journal article supplement (doi:10.7717/peerj.16933), 2024-02-27

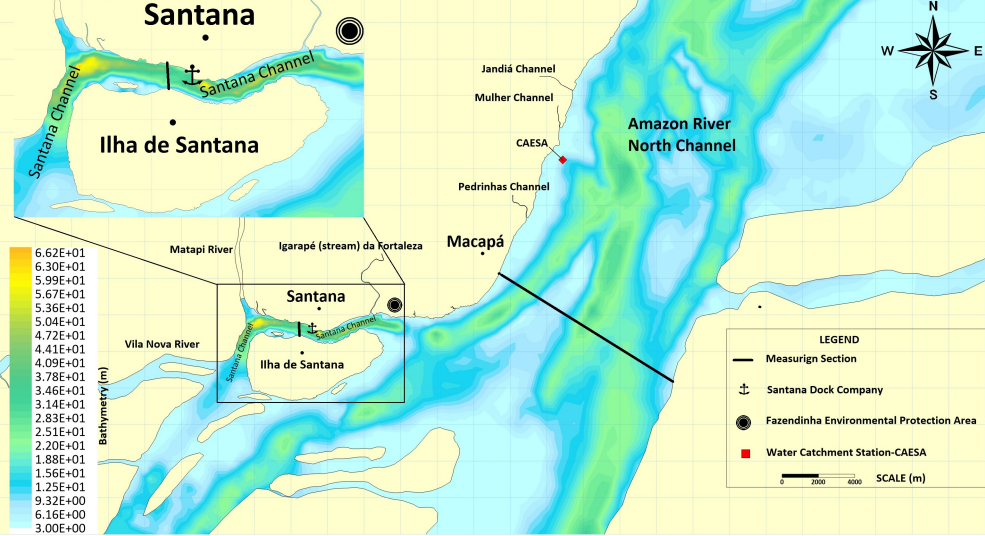

Supplement: Bathymetry_in_the_study_region.pdf [file Bathymetry_in_the_study_region.pdf]
